# Supplementary material for: Iron minerals inhibit the growth of bacteria via a free-radical mechanism: Implications for soil carbon storage
Source: Copernicus journal article supplement (doi:10.5194/bg-2018-479), 2018-12-10
Supplement: Supplementary file 1 [file bg-2018-479-supplement.pdf]

Supplementary Information (SI) for

## **Iron minerals inhibit the growth of bacteria via a free-radical mechanism**

**Hai-Yan Du<sup>1</sup>, Guang-Hui Yu<sup>1, 2</sup>, Fu-Sheng Sun<sup>1, 2</sup>, Muhammad Usman<sup>3, 4</sup>,  
5 Bernard A. Goodman<sup>5</sup>, Wei Ran<sup>1</sup>, Qi-Rong Shen<sup>1</sup>**

1. Jiangsu Provincial Key Lab for Organic Solid Waste Utilization, College of Resources & Environmental Sciences, Nanjing Agricultural University, Nanjing 210095, China

2. Institute of Surface-Earth System Science, Tianjin University, Tianjin 300072,  
10 China

3. Environmental Mineralogy, Center for Applied Geosciences, University of Tübingen, 72074 Tübingen, Germany

4. Institute of Soil and Environmental Sciences, University of Agriculture, Faisalabad 38040, Pakistan

15 5. College of Physical Science and Technology, Guangxi University, Nanning 530004, Guangxi, China

*Correspondence to:* Guang-Hui Yu (yuguanghui@njau.edu.cn or  
yuguanghui@tju.edu.cn)

## 20    **Supporting Methods**

*X-ray diffraction (XRD).* The synthetic Fe(III)-containing minerals used in this study were analyzed using X-ray diffraction (XRD) (Nanjing Normal University). Diffraction patterns were recorded from 3° to 60° 2-theta using Ni-filtered Cu K $\alpha$  radiations and counting for 1 s per step with a step size of 0.02° (Li et al., 2016).

25    *Analysis of FTIR Spectroscopy.* Samples were prepared as a mixture of 1 mg of minerals and 100 mg of potassium bromide (KBr, IR grade), and this mixture was then ground and homogenized. A subsample was then compressed between two clean, polished iron anvils twice in a hydraulic press at 20 000 psi to form a KBr window. The FTIR spectra were obtained by collecting 200 scans with a Nicolet 370 FTIR  
30    spectrometer (Yu et al., 2012).

*Analysis of amino acids.* To test the effect of produced hydroxyl radicals on substrate availability, the concentration of free and total amino acids was detected by Amino Acid Analyzer (L-8900, Hitachi High-Technologies Corporation, Tokyo, Japan). As for raw culture and a cultivation time of 12 h with montmorillonite and ferrihydrite,  
35    respectively, portions of the samples were filtered through a 0.22  $\mu$ m membrane filter. First, 1 mL of the samples was processed with 5 mL 6M HCl. Second, the mixtures were placed in the oven for 22 h at 110 °C and then vacuum drying. Finally, the 1 mL ultrapure water was used to redissolve the precipitate and filtered through a 0.22  $\mu$ m membrane filter. The concentration of free and total amino acids for samples were  
40    analyzed by Amino Acid Analyzer and the values are expressed as the mean  $\pm$  SE (n = 3). A standard amino acid mixture of cysteic acid and methionine sulfone (20  $\mu$ L mL<sup>-1</sup>) was diluted to 100  $\mu$ mol L<sup>-1</sup> for amino acid quantification and calibration. An external standard was used to calculate the concentration of each amino acid.

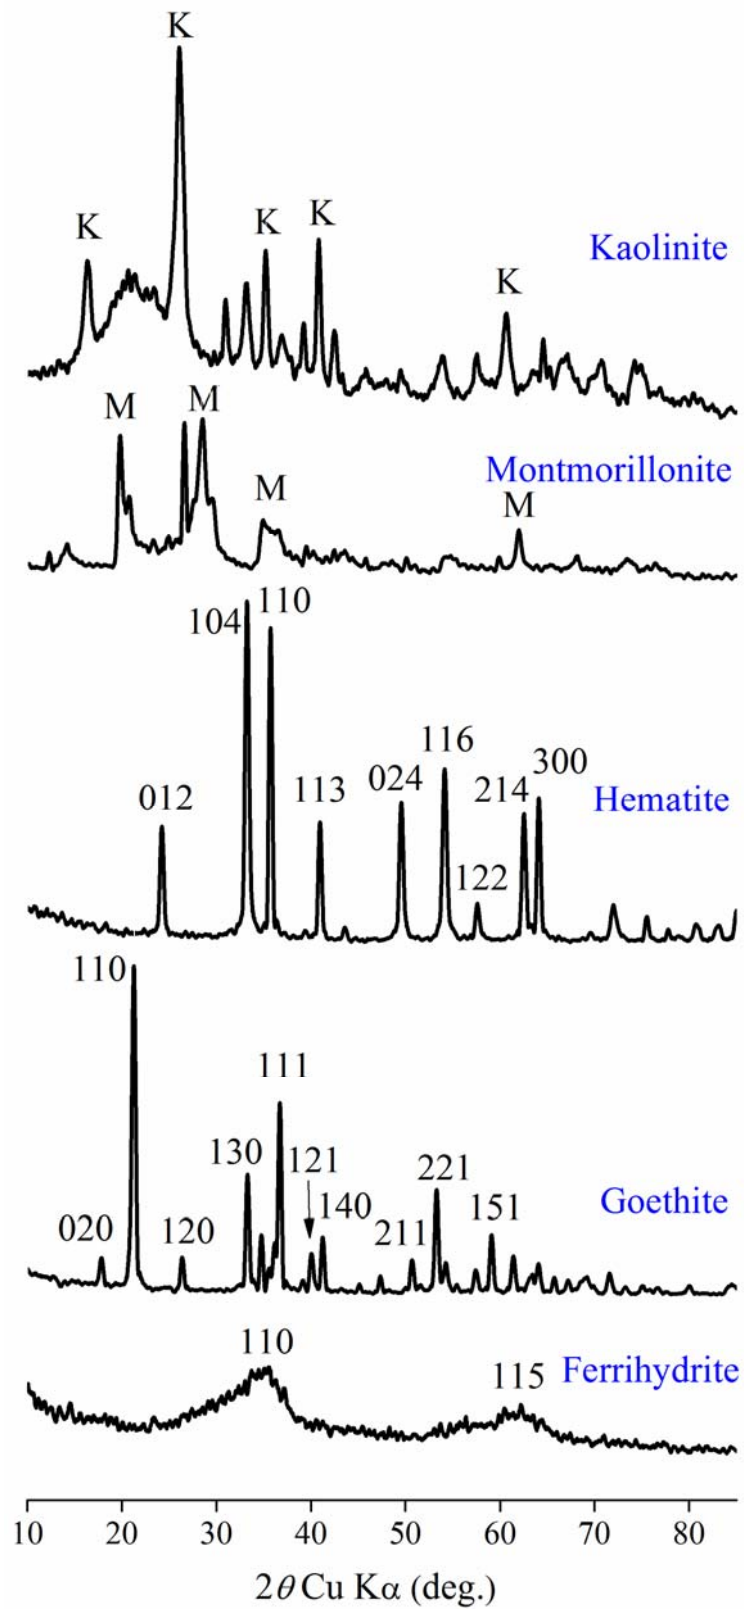

45 **Figure S1.** Powder X-ray diffraction (XRD) pattern of the minerals used in this study.

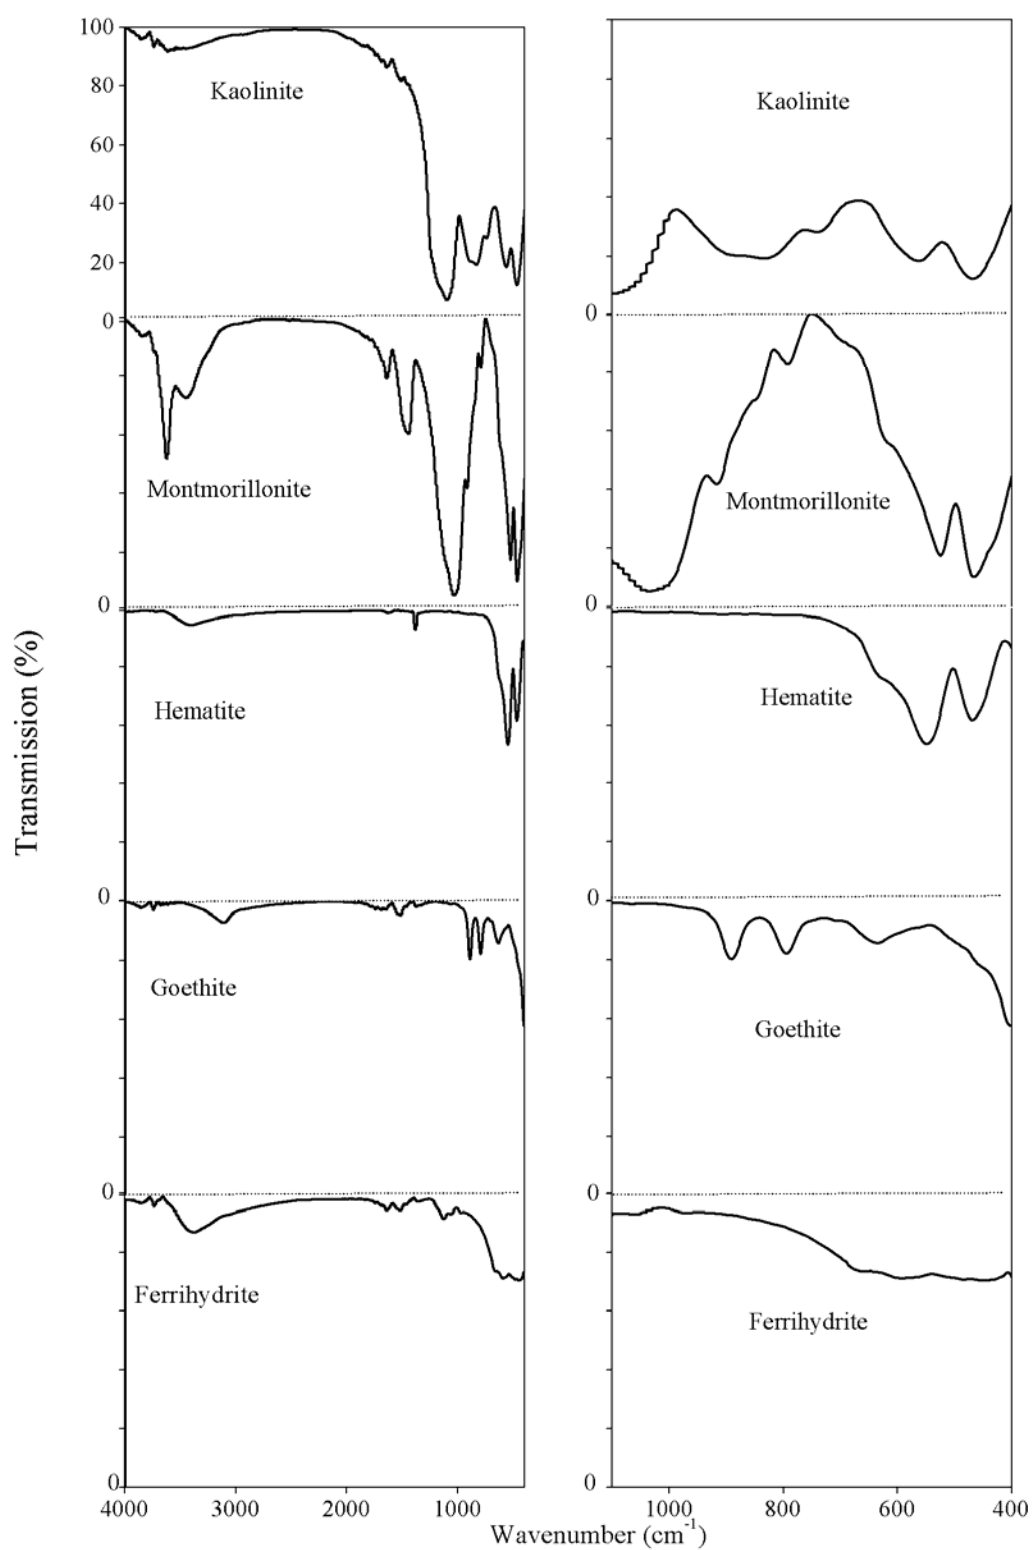

**Figure S2.** FTIR spectra of the minerals used in this study.

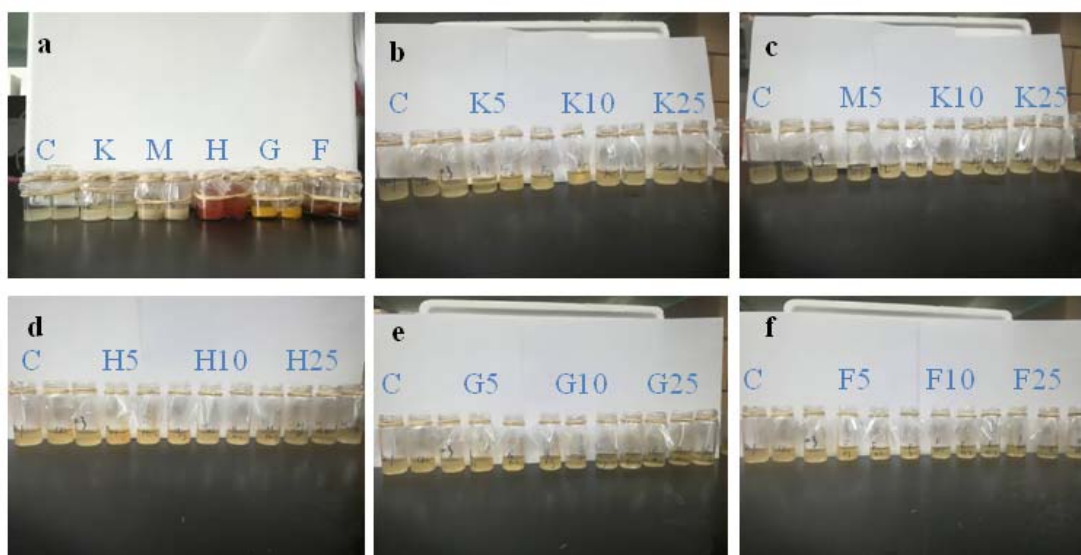

50 **Figure S3.** Photographs of the pre-cultivation media after 12 h growth (a) and the  
sub-cultivation media after 8 h (b-f). (b) control vs K. (c) control vs M. (d) control vs  
H. (e) control vs G. (f) control vs F. K, kaolinite; M, montmorillonite; H, hematite; G,  
goethite; F, ferrihydrite; C, Control (i.e., no mineral). The number 5, 10, and 25  
represents the concentration of mineral (Unit:  $\text{mg mL}^{-1}$ ). All experiments were  
55 performed in triplicate.

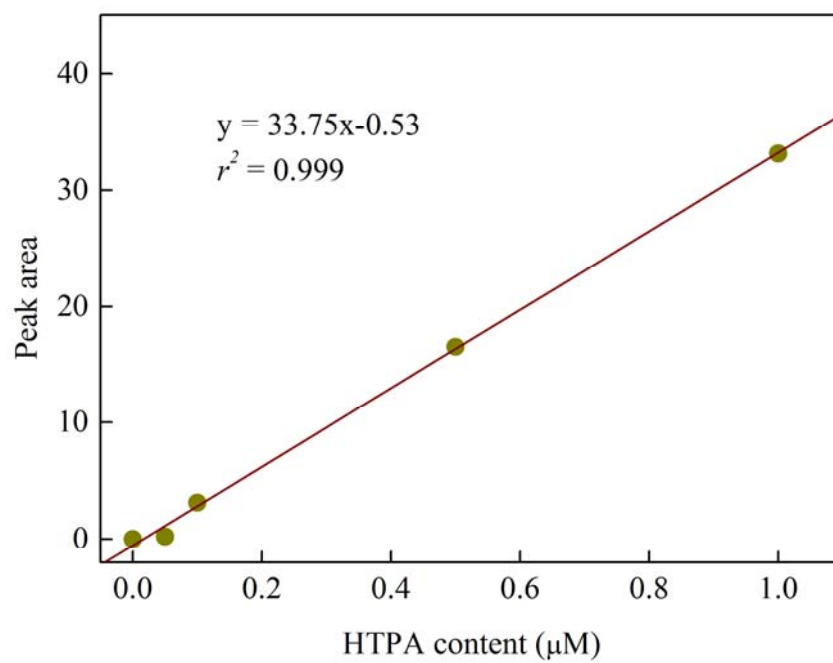

**Figure S4.** Standard curve of specific fluorescent dihydroxyterephthalic acid (HTPA).

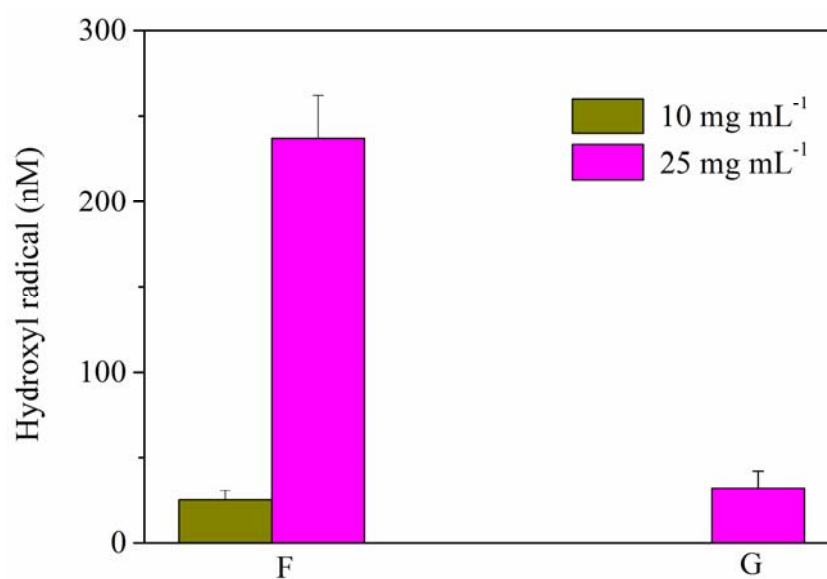

60

**Figure S5.** Generation of hydroxyl radical (HO•) after 2 h growth of *Pseudomonas brassicacearum* J12 with different concentrations (i.e., 10 and 25 mg mL<sup>-1</sup>) of minerals. F, ferrihydrite; G, goethite. Values are the mean  $\pm$  SE (n = 3).

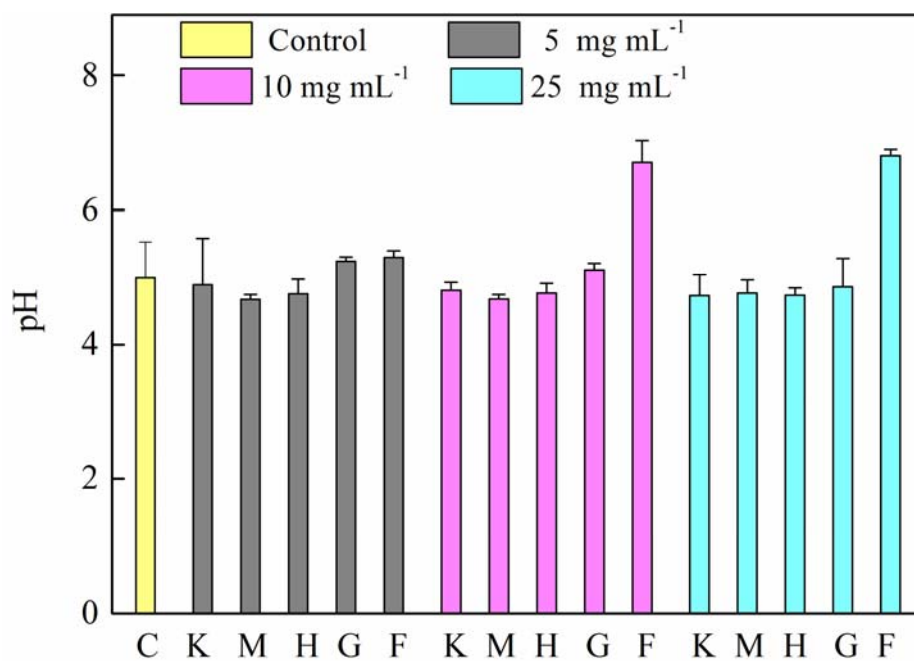

**Figure S6.** Determination of pH after 12 h growth of *Pseudomonas brassicacearum* J12 with different minerals and with no minerals (control). K, kaolinite; M, montmorillonite; H, hematite; G, goethite; F, ferrihydrite; C, Control (i.e., no mineral). Values are the mean  $\pm$  SE ( $n = 3$ ).



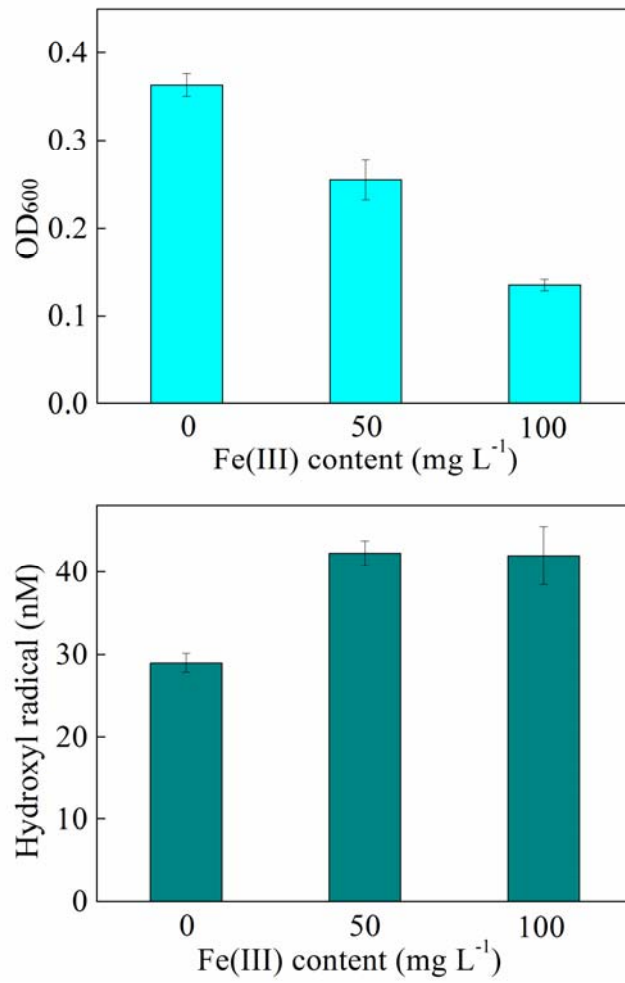

**Figure S7.** (a) Optical density at 600 nm (OD<sub>600</sub>) of 8-h-old *Pseudomonas brassicacearum* J12 subcultures taken after 12 h growth. (b) Generation of hydroxyl radical (HO•) at 12 h as measured by dihydroxyterephthalic acid (HTPA) production, which are derived from terephthalic acid (TPA) trapping HO•. The concentrations of Fe(NO<sub>3</sub>)<sub>3</sub> were 0, 50 and 100 mg L<sup>-1</sup>.

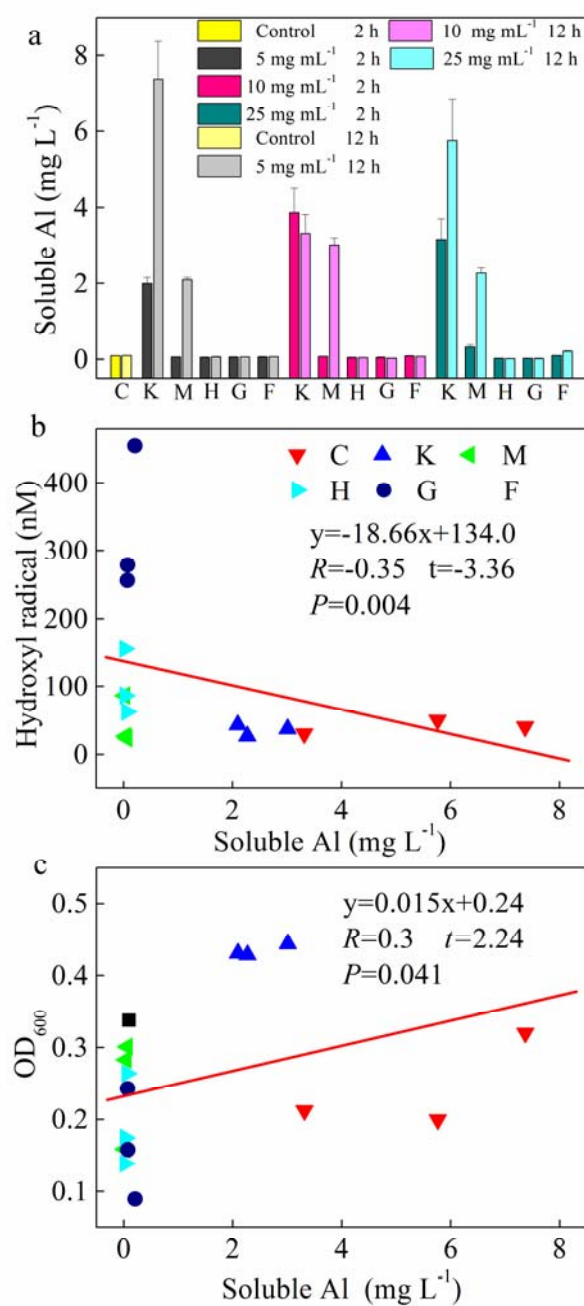

**Figure S8.** (a) Production of soluble Al after 2 h and 12 h cultivation. K, kaolinite; M, montmorillonite; H, hematite; G, goethite; F, ferrihydrite; C, control, no minerals.

80 Values in (a) are the mean  $\pm$  SE ( $n = 3$ ). Correlation analysis between HO<sup>•</sup> concentration and soluble Al is shown in (b), and correlation analysis between OD<sub>600</sub> and soluble Al is shown in (c).

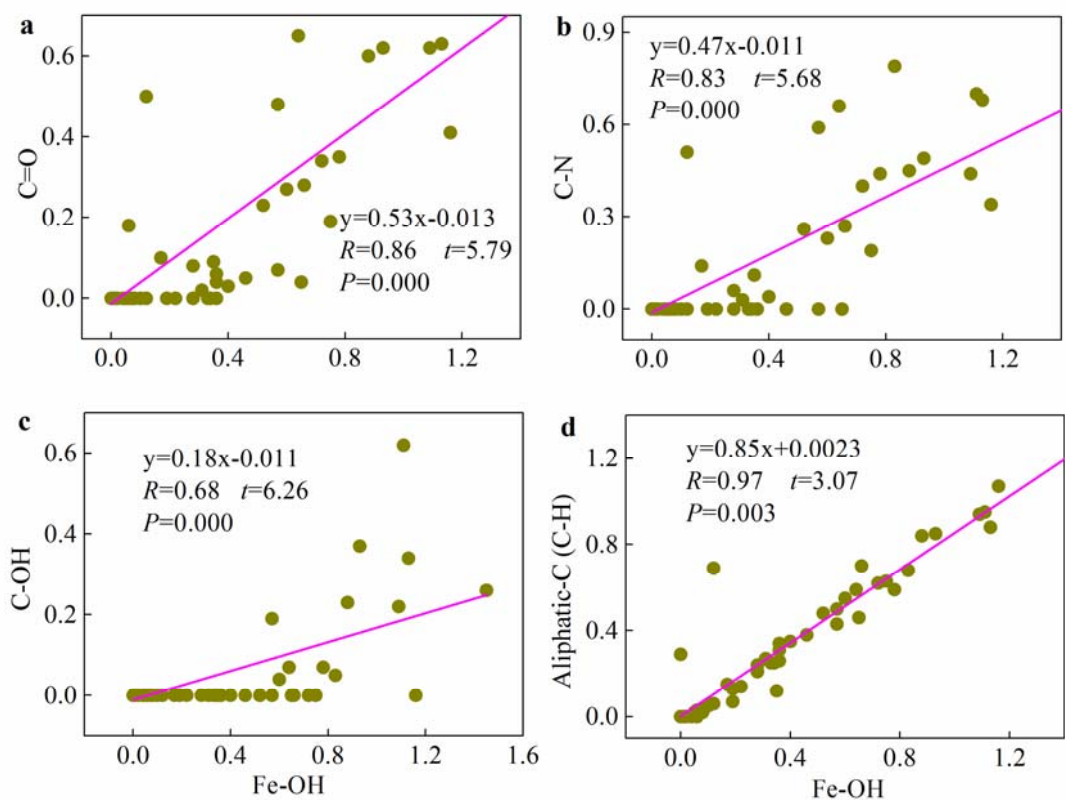

85 **Figure S9.** Correlation analysis between the distribution of Fe-OH (absorbance at 3344  $\text{cm}^{-1}$ ) and aliphatic C (C-H, absorbance at 2921  $\text{cm}^{-1}$ ) or aromatic C=O (absorbance at 1632  $\text{cm}^{-1}$ ) or C-OH (absorbance at 1513  $\text{cm}^{-1}$ ) or C-N (absorbance at 1030  $\text{cm}^{-1}$ ).  $n = 47$ .

**Table S1.** The particle size distribution (% in volume) of both the applied raw minerals and the changes after 24 h of cultivation.

| Samples <sup>a</sup> | <0.1 $\mu\text{m}$ | 0.1-0.5 $\mu\text{m}$ | 0.5-1 $\mu\text{m}$ | 1-2 $\mu\text{m}$ | 2-5 $\mu\text{m}$ | 5-10 $\mu\text{m}$ | 10-20 $\mu\text{m}$ | 20-50 $\mu\text{m}$ | 50-100 $\mu\text{m}$ | 100-500 $\mu\text{m}$ | 500-1000 $\mu\text{m}$ |
|----------------------|--------------------|-----------------------|---------------------|-------------------|-------------------|--------------------|---------------------|---------------------|----------------------|-----------------------|------------------------|
| K                    | 0.2                | 31.2                  | 21.5                | 15.0              | 15.6              | 4.9                | 1.9                 | 1.2                 | 1.7                  | 6.8                   | 0.0                    |
| M                    | 1.1                | 12.3                  | 6.1                 | 5.1               | 9.1               | 4.0                | 3.2                 | 8.9                 | 16.1                 | 34.1                  | 0.0                    |
| H                    | 0.0                | 95.0                  | 5.0                 | 0.0               | 0.0               | 0.0                | 0.0                 | 0.0                 | 0.0                  | 0.0                   | 0.0                    |
| G                    | 0.0                | 94.1                  | 1.5                 | 0.0               | 0.0               | 0.0                | 0.0                 | 0.0                 | 1.0                  | 3.4                   | 0.0                    |
| F                    | 1.5                | 16.3                  | 8.2                 | 3.7               | 6.3               | 6.1                | 7.6                 | 14.8                | 12.4                 | 22.5                  | 0.6                    |
| K+bacteria           | 0.7                | 27.2                  | 17.5                | 14.1              | 15.5              | 4.9                | 2.2                 | 2.1                 | 3.5                  | 12.3                  | 0.0                    |
| M+bacteria           | 1.7                | 25.2                  | 10.1                | 8.3               | 12.3              | 4.0                | 1.4                 | 1.5                 | 7.6                  | 27.9                  | 0.0                    |
| H+bacteria           | 0.0                | 90.6                  | 6.3                 | 3.1               | 0.0               | 0.0                | 0.0                 | 0.0                 | 0.0                  | 0.0                   | 0.0                    |
| G+bacteria           | 0.0                | 61.5                  | 15.3                | 1.4               | 6.8               | 1.4                | 0.9                 | 1.7                 | 2.5                  | 8.5                   | 0.0                    |
| F+bacteria           | 1.1                | 11.2                  | 6.1                 | 3.7               | 7.6               | 5.5                | 7.3                 | 13.1                | 13.3                 | 31.1                  | 0.0                    |

90 <sup>a</sup> K, kaolinite; M, montmorillonite; H, hematite; G, goethite; F, ferrihydrite.

**Table S2.** One-sample Kolmogorov-Smirnov Test of data in **Figure 4**.

| <b>One-sample Kolmogorov-Smirnov Test</b> |                |              |                       |                   |                 |               |
|-------------------------------------------|----------------|--------------|-----------------------|-------------------|-----------------|---------------|
| <b>Indices</b>                            |                | <b>OD600</b> | <b>HO<sup>•</sup></b> | <b>soluble Fe</b> | <b>Total Fe</b> | <b>Fe(II)</b> |
| N                                         |                | 16           | 16                    | 16                | 16              | 16            |
| Normal distribution parameters            | Average        | 0.262        | 106.0                 | 22.2              | 390.4           | 76.1          |
|                                           | SD             | 0.110        | 122.3                 | 29.3              | 936.6           | 133.3         |
| The most extreme differences              | Absolute value | 0.123        | 0.314                 | 0.227             | 0.423           | 0.346         |
|                                           | Positive       | 0.110        | 0.314                 | 0.207             | 0.423           | 0.346         |
|                                           | Negative       | -0.123       | -0.250                | -0.227            | -0.340          | -0.294        |
| Kolmogorov-Smirnov Z                      |                | 0.493        | 1.255                 | 0.907             | 1.693           | 1.384         |
| Asymptotic significant (bilateral)        |                | 0.968        | 0.086                 | 0.383             | 0.006           | 0.043         |

95 **Table S3.** The linear combination fitting (LCF) results of the Fe K-edge XANES spectra of ferrihydrite in **Figure 5**.

| Position | Linear combination fitting results (%) |          |          |                                 |                                                               | Parameters |            |
|----------|----------------------------------------|----------|----------|---------------------------------|---------------------------------------------------------------|------------|------------|
|          | Ferrihydrite                           | Goethite | Hematite | FeC <sub>2</sub> O <sub>4</sub> | Fe <sub>2</sub> (C <sub>2</sub> O <sub>4</sub> ) <sub>3</sub> | R-factor   | Chi-square |
| A        | 81.6                                   | 0        | 0        | 17.3                            | 6.1                                                           | 0.00086    | 0.000226   |
| B        | 44.2                                   | 18.9     | 13.4     | 25.9                            | 0                                                             | 0.00013    | 0.000212   |

**Table S4.** The concentration of free and total amino acids in cultures without or with mineral cultivation (12 h).

| Cultures     | FAA ( $\mu\text{g mL}^{-1}$ ) | TAA ( $\mu\text{g mL}^{-1}$ ) | FAA/TAA ratio      |
|--------------|-------------------------------|-------------------------------|--------------------|
| Raw culture  | $740.7 \pm 3.74$              | $6861 \pm 7.05$               | $0.108 \pm 0.0004$ |
| M + bacteria | $236.9 \pm 59.33$             | $6785 \pm 34.31$              | $0.035 \pm 0.0086$ |
| F + bacteria | $972.9 \pm 2.65$              | $6230 \pm 363.5$              | $0.156 \pm 0.0096$ |

Note: FAA, free amino acids. TAA, total amino acids. M, montmorillonite. F,

100 ferrihydrite. Mineral concentration was  $25 \text{ mg mL}^{-1}$ .

## References

- Li, H., Hu, S., Polizzotto, M. L., Chang, X., Shen, Q., Ran, W., and Yu, G.: Fungal biomineralization of montmorillonite and goethite to short-range-ordered minerals, *Geochim. Cosmochim. Acta*, 191, 17-31, 2016.
- 105 Yu, G. H., Wu, M. J., Wei, G. R., Luo, Y. H., Ran, W., Wang, B. R., Zhang, J. C., and Shen, Q. R.: Binding of organic ligands with Al(III) in dissolved organic matter from soil: implications for soil organic carbon storage, *Environ. Sci. Technol.*, 46, 6102-6109, 2012.
